# Supplementary material for: Dynamics of carbene formation in the reaction of methane with the tantalum cation in the gas phase
Source: Royal Society of Chemistry journal article supplement (doi:10.1039/d3fd00171g), 2024-01-01
Supplement: d3fd00171g1.pdf [file d3fd00171g1.pdf]

# Journal Name

## ARTICLE TYPE

Dynamics of carbene formation in the reaction of methane with the tantalum cation in the gas phase

Supplementary Information

Marcel Meta,<sup>a</sup> Maximilian E. Huber,<sup>a</sup> Maurice Birk,<sup>a</sup> Martin Wedele,<sup>a</sup> Milan Ončák,<sup>b</sup> and Jennifer Meyer<sup>a\*</sup>

- Figure S1: Reaction coordinate for  $\text{Ta}^+ + \text{CH}_4$  including stationary points of lower importance
- Figure S2: Internal energy distributions
- Figure S3: Direct comparison of internal and  $\text{TaCH}_2^+$  energy distributions and mean values of the respective distributions
- Figure S4: Velocity distribution for  $\text{Ta}^+ + \text{CH}_4$  at  $E_{\text{rel}} \approx 1.0 \text{ eV}$  for selected reactant ion velocity subsets
- Figure S5: Graphical error representation of product ion velocity distribution
- Table S1: Time-of-flight values for species of interest
- Table S2: Benchmarking relative energies (in eV) for three multiplicities in  $[\text{TaCH}_4]^+$
- Table S3: Benchmarking of reaction energies (in eV) including Ta–H and Ta–C bonds
- Cartesian coordinates and energies for optimized structures for  $\text{Ta}^+ + \text{CH}_4$

<sup>a</sup> RPTU Kaiserslautern-Landau, Fachbereich Chemie und Forschungszentrum OPTIMAS, Erwin-Schrödinger Str. 52, 67663 Kaiserslautern, Germany. Tel: +49 631 205 4211; Fax: +49 631 205 2750; E-mail: jennifer.meyer@chem.rptu.de

<sup>b</sup> Universität Innsbruck, Institut für Ionenphysik und Angewandte Physik, Technikerstrasse 25, 6020 Innsbruck, Austria.

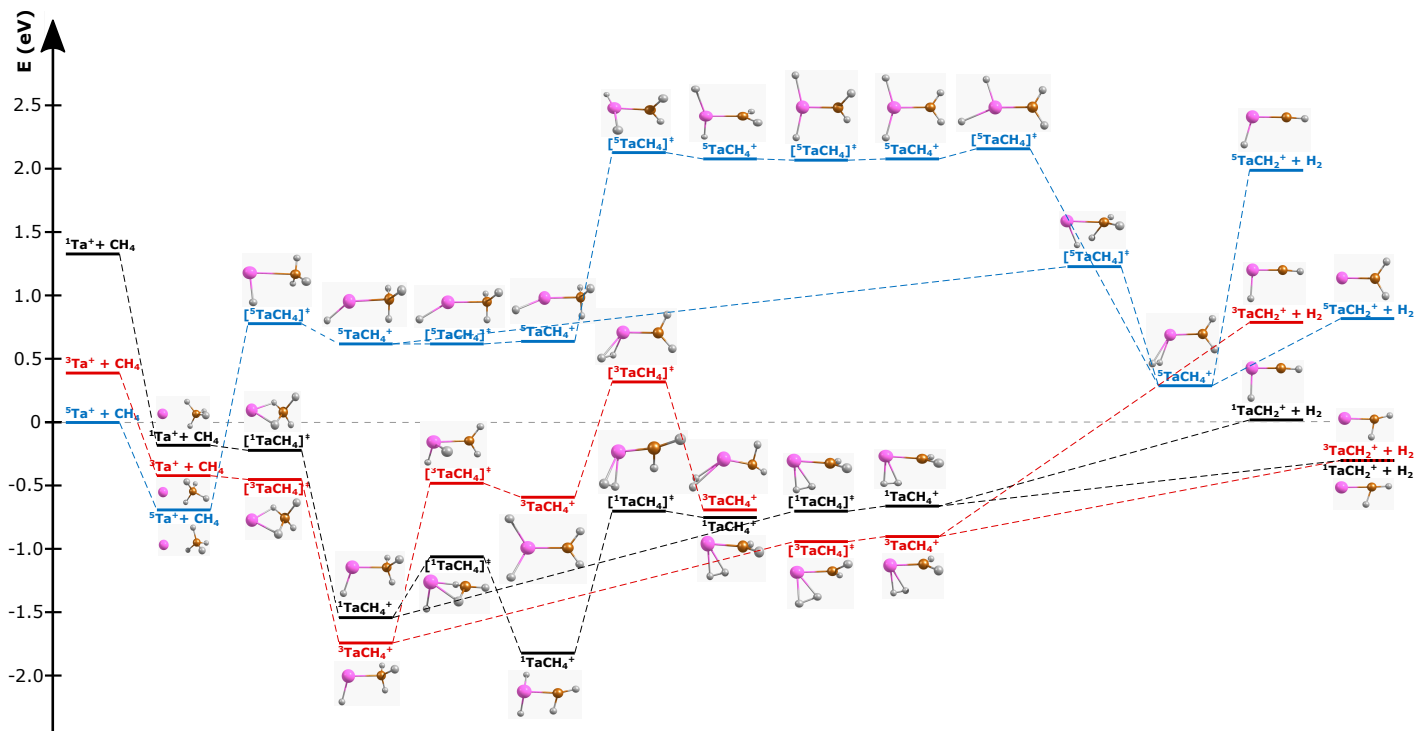

Fig. S1 Reaction pathway for  $\text{Ta}^+ + \text{CH}_4 \longrightarrow \text{TaCH}_2^+ + \text{H}_2$  with structures of the stationary points along the reaction coordinate, i.e. for the pre-reaction complex (entrance channel), intermediates, post-reaction complexes as well the transition states, for the quintet surface (blue), triplet (red) and singlet (black) are given (Ta = pink, carbon = orange, hydrogen = white, structural data can be found in the supplementary information). Details of hydrogen atom migration and subsequent rearrangement are shown in detail here, that have been omitted for clarity in figure 1 of the main manuscript. Energies are given in electron volts relative to the isolated ground state reactants  ${}^5\text{Ta}^+ + \text{CH}_4$ . Calculated at the CCSD(T)//B3LYP level (see methods section of the main manuscript for details). The energy of transition states below local minima is induced through the zero-point energy correction.

Table S1 Time-of-flight (tof) values for ions of interest calculated using the experimental time-of-flight constant  $C_{\text{exp}} = 0.801$

|                                  | m/z    | tof / $\mu\text{s}$ |
|----------------------------------|--------|---------------------|
| $\text{Ta}^+$                    | 181    | 10.77               |
| $\text{TaC}^+$                   | 181+12 | 11.12               |
| $\text{TaCH}_2^+$                | 181+14 | 11.18               |
| $\text{TaCD}_2^+ / \text{TaO}^+$ | 181+16 | 11.24               |

Table S2 Relative energies (in eV) for three multiplicities in several structures of  $[\text{TaCH}_4]^+$  optimized at the B3LYP level in a selected spin multiplicity and calculated at various levels of theory along with the aug-cc-pVDZ basis set. No zero-point correction is added. Energies shown in italics are too high, most probably due to the limited size of the active space in the MRCI calculation.

| Method    | Multiplicity | $[\text{Ta} \cdot \text{CH}_4]^+$<br>(M = 5) | $[\text{HTaCH}_3]^+$<br>(M = 1) | $[\text{H}_2\text{TaCH}_2]^+$<br>(M = 1) | $[\text{H}_2 \cdot \text{TaCH}_2]^+$<br>(M = 3) | $[\text{H}_2 \cdot \text{TaCH}_2]^+$<br>(M = 3) |
|-----------|--------------|----------------------------------------------|---------------------------------|------------------------------------------|-------------------------------------------------|-------------------------------------------------|
| B3LYP     | 1            | 0.53                                         | 0.19                            | 0.00                                     | 0.14                                            | 0.24                                            |
|           | 3            | 0.38                                         | 0.00                            | 1.70                                     | 0.00                                            | 0.00                                            |
|           | 5            | 0.00                                         | 3.30                            | 5.60                                     | 1.45                                            | 2.33                                            |
| CCSD      | 1            | 0.64                                         | 0.22                            | 0.00                                     | 0.16                                            | 0.29                                            |
|           | 3            | 0.48                                         | 0.00                            | 1.70                                     | 0.00                                            | 0.00                                            |
|           | 5            | 0.00                                         | 3.34                            | 5.81                                     | 1.48                                            | 2.36                                            |
| MRCI(6,7) | 1            | 0.98                                         | 0.43                            | 0.00                                     | 0.30                                            | 0.71                                            |
|           | 3            | 0.54                                         | 0.00                            | 1.50                                     | 0.00                                            | 0.00                                            |
|           | 5            | 0.00                                         | 3.42                            | 5.85                                     | 3.74                                            | 2.40                                            |
| MRCI(8,8) | 1            | 0.98                                         | 0.38                            | 0.00                                     | 0.29                                            | 0.68                                            |
|           | 3            | 0.49                                         | 0.00                            | 1.74                                     | 0.00                                            | 0.00                                            |
|           | 5            | 0.00                                         | 3.39                            | 6.24                                     | 1.50                                            | 2.36                                            |
| MRCI(6,8) | 1            | 0.86                                         | 0.44                            | 0.00                                     | 0.29                                            | 0.71                                            |
|           | 3            | 0.42                                         | 0.00                            | 1.70                                     | 0.00                                            | 0.00                                            |
|           | 5            | 0.00                                         | 3.71                            | 5.68                                     | 3.75                                            | 2.37                                            |

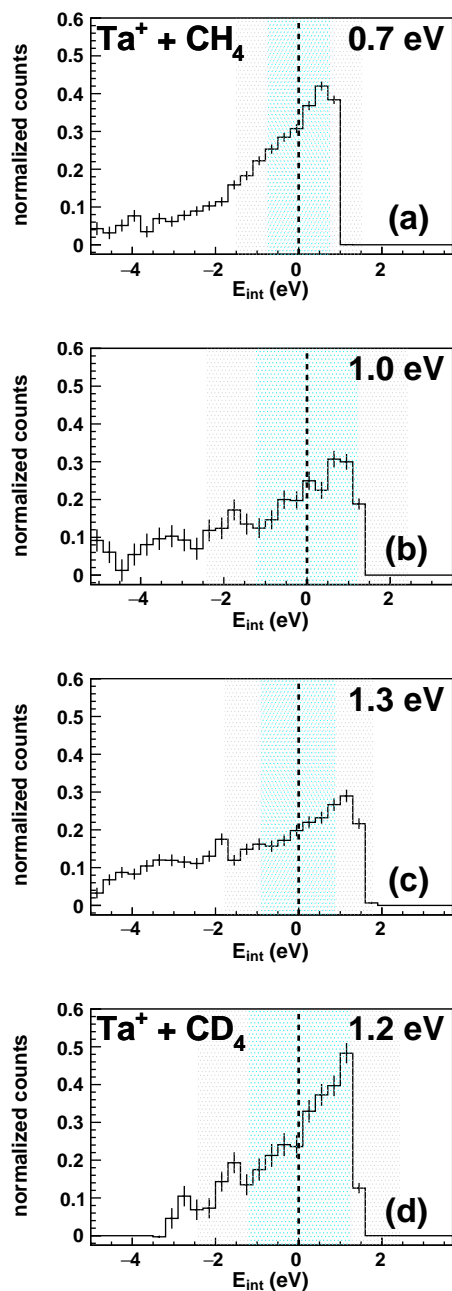

Fig. S2 Internal energy  $E_{\text{int}}$  distributions for  $\text{Ta}^+ + \text{CH}_4 \longrightarrow \text{TaCH}_2^+ + \text{H}_2$  (a-c) and  $\text{Ta}^+ + \text{CD}_4 \longrightarrow \text{TaCD}_2^+ + \text{D}_2$  (d). The internal energy is the difference between the total available energy to the reactive collision, i. e. relative collision energy and reaction exothermicity ( $E_{\text{rel}} + E_{\text{exo}}$ ) and the amount of energy partitioned into product translation ( $E'_{\text{rel}}$ ), i. e. into kinetic energy of  $\text{TaCH}_2^+$  and  $\text{H}_2$ :  $E_{\text{int}} = E_{\text{rel}} + E_{\text{exo}} - E'_{\text{rel}}$ . The energy resolution was calculated using Gaussian error propagation<sup>1</sup>. The  $\pm 1\sigma$ -intervals are given by the dark gray area and the respective  $\pm 2\sigma$  by light cyan area. The low energy tails extends beyond the energy defined by the  $2\sigma$ -error (see also table 1 of the main manuscript). In words, this means that an unavailable amount of energy is converted into kinetic energy<sup>2</sup>. Possible explanations are missing contributions to the energy balance, for example electronically excited states of  $\text{Ta}^+$  contributing or internal energy of  $\text{CH}_4$ . The unfavorable kinematics add to the effect<sup>2</sup>. A more detailed discussion can be found in the main manuscript.

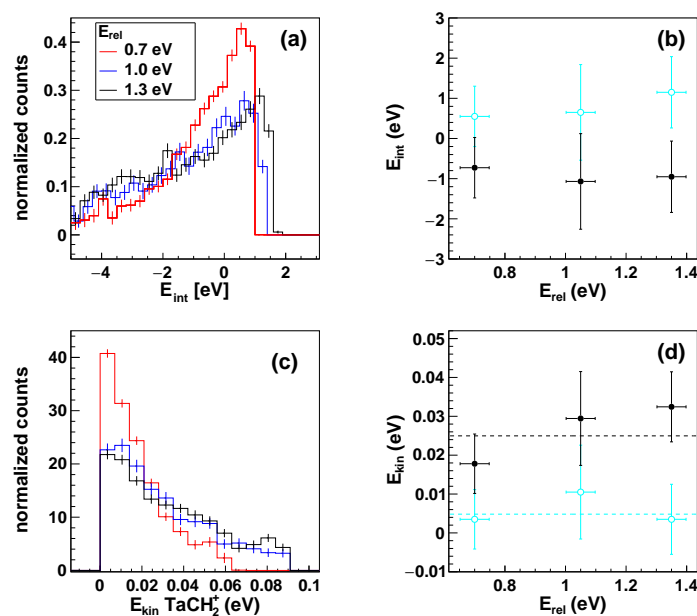

Fig. S3 Top row: internal energy. (a) Distributions of the internal energy for all three relative impact energies. (b) Plot of mean (black dots) and maximum (turquoise dots) for the distribution of the internal energy. Bottom row: kinetic energy. (c) Plot of the distribution of the kinetic energy of the product ion at the three different relative collision energies. (d) Plot of the mean values (black dots) and maxima (turquoise dots) for the kinetic energy distribution.

Table S3 Benchmarking of reaction energies (in eV) including Ta–H and Ta–C bonds as calculated at the B3LYP/aug-cc-pVTZ ('B3LYP'), CCSD/aug-cc-pVTZ//B3LYP/aug-cc-pVTZ ('CCSD'), CCSD(T)/aug-cc-pVTZ//B3LYP/aug-cc-pVTZ ('CCSD(T)'). Experimental values are taken from Ref.<sup>3</sup> (Armentrout *et al.*, J. Phys. Chem. C 2011) and references therein.

| Reaction                                                    | B3LYP | CCSD | CCSD(T) | exp.            |
|-------------------------------------------------------------|-------|------|---------|-----------------|
| $\text{TaH}^+ \longrightarrow \text{Ta}^+ + \text{H}$       | 2.79  | 2.64 | 2.71    | $2.39 \pm 0.08$ |
| $\text{TaCH}^+ \longrightarrow \text{Ta}^+ + \text{CH}$     | 5.82  | 5.51 | 6.08    | $5.82 \pm 0.16$ |
| $\text{TaCH}_2^+ \longrightarrow \text{Ta}^+ + \text{CH}_2$ | 5.05  | 4.89 | 5.28    | $4.81 \pm 0.03$ |
| $\text{TaCH}_3^+ \longrightarrow \text{Ta}^+ + \text{CH}_3$ | 3.22  | 3.09 | 3.30    | $2.69 \pm 0.14$ |

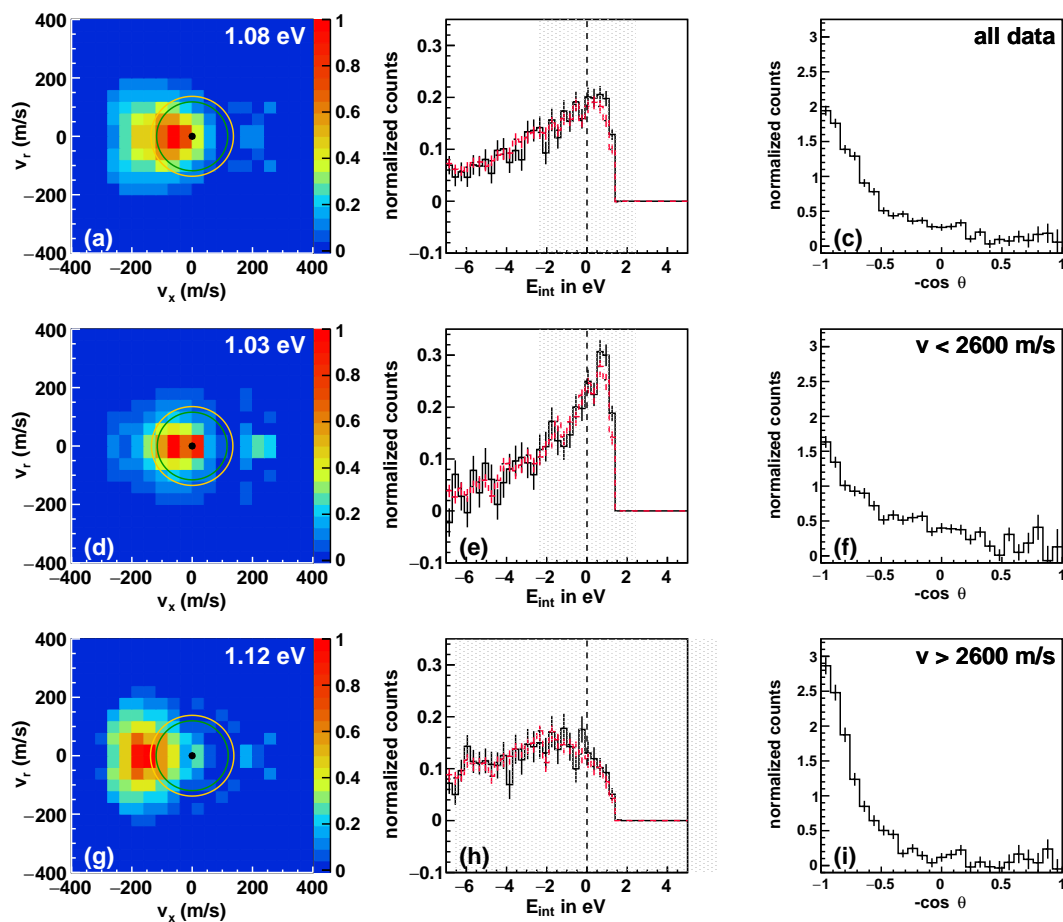

Fig. S4 Velocity distributions for  $\text{Ta}^+ + \text{CH}_4 \longrightarrow \text{TaCH}_2^+ + \text{H}_2$  at 1.0 eV relative collision energy. The different rows show different sets of scattering files just for data analysis. The selection is based on the ion beam velocity and done prior to scattering analysis. Top row: Full data set without pre-selection, middle row: ion beam velocities  $\leq 2,650$  m/s, bottom row: ion beam velocities  $\geq 2,650$  m/s. The Left column (a,d,g) show the respective velocity distributions normalized to the bin of highest intensity. The superimposed rings indicate the kinematic cut-offs. The internal energy distributions for the full scattering range (black solid) and the forward hemisphere (pink, dashed) are shown in the second column (b,e,h) and the right column shows the integrated angular distributions (c,f,i). The gray area indicates the  $2\sigma$ -error interval and the light blue area the  $2\sigma$ -error interval. The pre-selected files are randomly distributed during the measurement campaign with one exception of several files all being recorded on a single day. It is obvious that careful preparation of the ion beam is key to a successful experiment. Although the 'deviations' seen for  $v \geq 2,600$  m/s is also reproducible. We do not completely understand the origin of this but we think the huge mass difference combined with the large scattering angle in the laboratory frame makes the current experiment extremely sensitive to variations in source conditions.

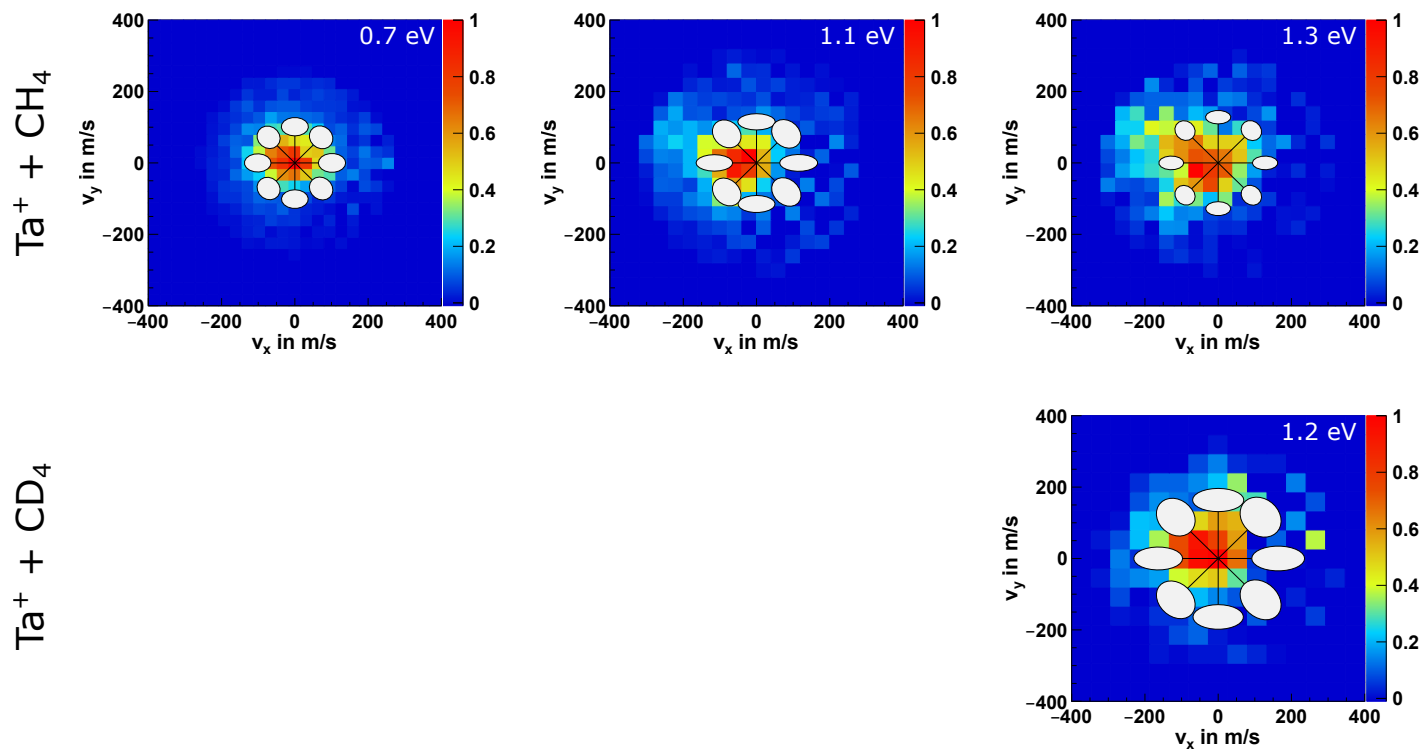

Fig. S5 Graphical error representation of product ion velocity distribution for  $\text{TaCH}_2^+$  (upper panel) and  $\text{TaCD}_2^+$  (lower panel) displayed as 2D slice at the given relative collision energies. The ellipses are centred at the velocities of the kinematic cut-off which means that none of the available energy is partitioned into internal excitation of  $\text{TaCH}_2^+/\text{TaCD}_2^+$  and/or  $\text{H}_2/\text{D}_2$ . They indicate the  $1\sigma$  error and are the results of a Gaussian error propagation based on the mean velocity angular spread of the reactant beams. Details on the derivation can be found in ref.<sup>1</sup>.

Cartesian coordinates B3LYP functional and the aug-cc-pVTZ basis set on C, H and ECP60MDF\_AVTZ on Ta optimized structures (in Å) along with the electronic energy (in Hartrees)

**Ta<sup>+</sup> (M=5)**

$E = -57.0464675242$

Ta 0.000000 0.000000 0.000000

**CH<sub>4</sub>**

$E = -40.493888$

C 0.000000 0.000000 0.000000

H 0.628319 0.628319 0.628319

H -0.628319 -0.628319 0.628319

H 0.628319 -0.628319 -0.628319

H -0.628319 0.628319 -0.628319

**H<sub>2</sub>**

$E = -1.169960$

H 0.000000 0.000000 0.371432

H 0.000000 0.000000 -0.371432

**LM1 (M=1)**

$E = -97.542808$

C -2.169961 0.009788 0.010542

H -2.982130 -0.241901 -0.672569

H -2.526181 0.101376 1.033650

H -1.764831 0.972216 -0.350765

H -1.513677 -0.907053 -0.080388

Ta 0.298720 0.000228 0.000093

**LM2 (M=1)**

$E = -97.596676$

Ta -0.018149 -0.226618 0.000000

C -0.018149 1.808780 0.000000

H -0.574361 2.119726 0.900882

H 0.975452 2.267342 0.000000

H -0.574361 2.119726 -0.900882

H 1.607072 -0.816377 0.000000

**LM3 (M=1)**

$E = -97.596503$

C 1.647478 -0.048107 -0.005302

Ta -0.182207 -0.008538 -0.030286

H -0.446891 1.467499 0.844862

H 2.679895 -0.371080 0.038158

H 1.504067 1.070231 0.197861

H -0.320811 -1.254767 1.161839

**LM4 (M=1)**

$E = -97.559402$

H -0.345153 1.902587 0.043301

H 0.464702 1.771728 0.026470

Ta -0.197374 -0.043927 -0.004496

C 1.663037 -0.047593 -0.053872

H 1.656814 -0.159021 1.071400

H 2.653725 -0.023060 -0.489760

**LM5 (M=1)**

$E = -97.559524$

H 0.545699 1.707977 -0.000083

C 1.697432 -0.064901 0.000037

H 2.289488 -0.082071 0.918334

H 2.289593 -0.082141 -0.918189

Ta -0.205927 -0.041528 -0.000005

H -0.276670 1.877162 0.000106

**TS1/2 (M=1)**

$E = -97.542373$

H 1.152067 1.183390 -0.000000

C 1.802243 -0.010034 0.000000

Ta -0.248299 -0.001136 0.000000

H 2.416461 0.048368 0.901566

H 1.327383 -1.136974 -0.000000

H 2.416461 0.048368 -0.901566

**TS2/3 (M=1)**

$E = -97.566116$

C -1.649149 -0.030159 -0.000014

Ta 0.202057 -0.027884 -0.000002

H -1.242576 0.314963 1.115493

H 0.358584 1.692259 0.000139

H -1.242638 0.315187 -1.115444

H -2.728633 -0.105945 0.000062

**TS3/4 (M=1)**

$E = -97.556415$

H -0.401435 1.581772 -0.700552

H -0.431119 1.699196 0.281858

Ta -0.182061 -0.052614 0.002862

C 1.656322 -0.007769 -0.045961

H 1.489956 0.737625 0.807684

H 2.695110 -0.131181 -0.322184

**TS2/5 (M=1)**

$E = -97.559890$

H -0.880485 1.431630 0.000000

C -1.706028 -0.107102 -0.000000

H -2.300117 -0.133391 -0.916600

H -2.300117 -0.133392 0.916600

Ta 0.214940 -0.031631 0.000000

H 0.026244 1.786853 0.000000

**TaCH<sub>2</sub><sup>+</sup> (M=1), iso1**

$E = -96.375431$

Ta 0.010656 -0.190752 0.000000

C 0.010656 1.631330 0.000000

H -1.125223 1.457914 0.000000

H 0.283369 2.678979 0.000000

**TaCH<sub>2</sub><sup>+</sup> (M=1), iso2**

$E = -96.358329$

Ta 0.022391 -0.163735 0.000000

C 0.022391 1.587852 0.000000

H -0.056964 2.670010 0.000000

H -1.711921 -0.244490 0.000000

**LM1 (M=3)** $E = -97.550255$ 

|    |           |           |           |
|----|-----------|-----------|-----------|
| C  | -2.051701 | -0.003858 | -0.014092 |
| H  | -2.881174 | 0.107341  | 0.686562  |
| H  | -2.406399 | -0.097876 | -1.038675 |
| H  | -1.550723 | -0.956472 | 0.318280  |
| H  | -1.494020 | 0.974404  | 0.132123  |
| Ta | 0.282774  | -0.000058 | -0.000188 |

**LM2 (M=3)** $E = -97.603424$ 

|    |           |           |           |
|----|-----------|-----------|-----------|
| Ta | -0.019738 | -0.228295 | 0.000000  |
| C  | -0.019738 | 1.813161  | 0.000000  |
| H  | -0.544291 | 2.167151  | 0.900566  |
| H  | 1.011432  | 2.188627  | 0.000000  |
| H  | -0.544291 | 2.167151  | -0.900566 |
| H  | 1.636480  | -0.736377 | 0.000000  |

**LM3 (M=3)** $E = -97.563049$ 

|    |           |           |           |
|----|-----------|-----------|-----------|
| C  | -0.016707 | 1.846441  | -0.000000 |
| Ta | -0.016707 | -0.196066 | 0.000000  |
| H  | 0.657388  | -0.828701 | 1.473787  |
| H  | 0.002550  | 2.445789  | -0.913479 |
| H  | 0.002550  | 2.445789  | 0.913479  |
| H  | 0.657388  | -0.828701 | -1.473787 |

**LM4 (M=3)** $E = -97.558412$ 

|    |           |           |           |
|----|-----------|-----------|-----------|
| C  | -0.028624 | 1.688690  | 0.000000  |
| Ta | -0.028624 | -0.155411 | 0.000000  |
| H  | 1.564410  | -1.537340 | 0.387982  |
| H  | -1.164369 | 1.567285  | 0.000000  |
| H  | 0.296822  | 2.720222  | 0.000000  |
| H  | 1.564410  | -1.537340 | -0.387982 |

**LM5 (M=3)** $E = -97.568275$ 

|    |           |           |           |
|----|-----------|-----------|-----------|
| H  | 0.553762  | 1.696589  | -0.000017 |
| C  | 1.700354  | -0.065693 | -0.000026 |
| H  | 2.293464  | -0.084158 | 0.917398  |
| H  | 2.293486  | -0.084038 | -0.917435 |
| Ta | -0.206485 | -0.041155 | 0.000005  |
| H  | -0.269450 | 1.870095  | -0.000150 |

**TS1/2 (M=3)** $E = -97.549709$ 

|    |           |           |           |
|----|-----------|-----------|-----------|
| H  | -1.213766 | 1.112797  | 0.000000  |
| C  | 0.002672  | 1.799755  | 0.000000  |
| Ta | 0.002672  | -0.247530 | -0.000000 |
| H  | -0.064041 | 2.415117  | 0.900074  |
| H  | -0.064041 | 2.415117  | -0.900074 |
| H  | 1.130739  | 1.328109  | 0.000000  |

**TS2/3 (M=3)** $E = -97.557841$ 

|    |           |           |           |
|----|-----------|-----------|-----------|
| H  | -0.390022 | -0.852271 | 1.393880  |
| C  | -1.787784 | 0.076402  | -0.046696 |
| Ta | 0.207671  | -0.019393 | -0.018610 |
| H  | -2.432750 | -0.687941 | -0.486539 |
| H  | -2.329349 | 0.881742  | 0.454198  |
| H  | 0.718828  | 1.615731  | 0.277168  |

**TS3/4 (M=3)** $E = -97.530373$ 

|    |           |           |           |
|----|-----------|-----------|-----------|
| H  | 1.142036  | 1.262006  | 0.639771  |
| H  | 1.142058  | 1.261994  | -0.639755 |
| Ta | 0.182714  | -0.049851 | 0.000004  |
| C  | -1.801267 | 0.147364  | -0.000033 |
| H  | -2.369333 | -0.794092 | -0.000034 |
| H  | -2.445254 | 1.025019  | -0.000052 |

**TS2/5 (M=3)** $E = -97.568696$ 

|    |           |           |           |
|----|-----------|-----------|-----------|
| H  | -0.878906 | 1.430684  | 0.000000  |
| C  | -1.708372 | -0.106119 | 0.000000  |
| H  | -2.303315 | -0.135058 | -0.915758 |
| H  | -2.303315 | -0.135058 | 0.915758  |
| Ta | 0.215217  | -0.031632 | 0.000000  |
| H  | 0.024925  | 1.785301  | 0.000000  |

**TaCH<sub>2</sub><sup>+</sup> (M=3), iso1** $E = -96.375989$ 

|    |           |           |          |
|----|-----------|-----------|----------|
| Ta | 0.010612  | -0.191445 | 0.000000 |
| C  | 0.010612  | 1.637953  | 0.000000 |
| H  | -1.124012 | 1.463230  | 0.000000 |
| H  | 0.285667  | 2.684530  | 0.000000 |

**TaCH<sub>2</sub><sup>+</sup> (M=3), iso2** $E = -96.336765$ 

|    |           |           |          |
|----|-----------|-----------|----------|
| Ta | 0.022271  | -0.172146 | 0.000000 |
| C  | 0.022271  | 1.680121  | 0.000000 |
| H  | -0.057584 | 2.762765  | 0.000000 |
| H  | -1.701843 | -0.276805 | 0.000000 |

**LM1 (M=5)** $E = -97.560854$ 

|    |           |           |           |
|----|-----------|-----------|-----------|
| H  | -1.565784 | 0.851131  | -0.032820 |
| C  | -2.281136 | -0.017842 | 0.006823  |
| Ta | 0.314146  | -0.000273 | 0.000018  |
| H  | -2.063453 | -0.843007 | -0.674939 |
| H  | -2.435665 | -0.357801 | 1.027662  |
| H  | -3.180956 | 0.476662  | -0.362134 |

**LM2 (M=5)** $E = -97.517506$ 

|    |           |           |           |
|----|-----------|-----------|-----------|
| H  | -1.757656 | 0.921244  | -0.000563 |
| C  | 2.154281  | 0.066026  | -0.000054 |
| Ta | -0.248054 | -0.022087 | 0.000026  |
| H  | 2.411691  | -0.431981 | -0.931886 |
| H  | 2.114086  | 1.157152  | -0.000918 |
| H  | 2.414108  | -0.430243 | 0.931830  |



**LM3 (M=5)** $E = -97.517979$ 

|    |           |           |           |
|----|-----------|-----------|-----------|
| Ta | -0.011697 | -0.238276 | 0.000000  |
| C  | -0.011697 | 2.071616  | 0.000000  |
| H  | 0.545139  | 2.193875  | 0.932335  |
| H  | 0.545139  | 2.193875  | -0.932335 |
| H  | -1.056332 | 2.375403  | 0.000000  |
| H  | 0.890078  | -1.798700 | 0.000000  |

**LM4 (M=5)** $E = -97.468369$ 

|    |           |           |           |
|----|-----------|-----------|-----------|
| C  | -0.000000 | -0.000000 | -1.837571 |
| Ta | 0.000000  | 0.000000  | 0.203613  |
| H  | -0.000000 | 1.837337  | 0.513187  |
| H  | -0.915262 | 0.000000  | -2.432343 |
| H  | 0.915262  | -0.000000 | -2.432343 |
| H  | -0.000000 | -1.837337 | 0.513187  |

**LM5 (M=5)** $E = -97.469067$ 

|    |           |           |           |
|----|-----------|-----------|-----------|
| Ta | 0.199941  | -0.000002 | 0.000054  |
| C  | -1.838094 | 0.000039  | -0.000408 |
| H  | 0.651918  | -1.810356 | -0.000280 |
| H  | 0.652194  | 1.810360  | -0.000364 |
| H  | -2.435727 | 0.914132  | -0.000326 |
| H  | -2.435524 | -0.914195 | -0.000492 |

**LM6 (M=5)** $E = -97.528234$ 

|    |           |           |           |
|----|-----------|-----------|-----------|
| C  | -0.042801 | 1.866325  | 0.000000  |
| Ta | -0.042801 | -0.194371 | 0.000000  |
| H  | 1.752622  | -0.977447 | 0.400044  |
| H  | -0.969064 | 2.449048  | 0.000000  |
| H  | 0.845061  | 2.496946  | 0.000000  |
| H  | 1.752622  | -0.977447 | -0.400044 |

**TS1/2 (M=5)** $E = -97.510842$ 

|    |           |           |           |
|----|-----------|-----------|-----------|
| H  | -0.014290 | 1.704158  | 0.000000  |
| C  | 2.260789  | -0.020917 | -0.000000 |
| Ta | -0.284312 | -0.020665 | 0.000000  |
| H  | 2.372054  | -1.100986 | -0.000003 |
| H  | 2.416126  | 0.515450  | -0.928845 |
| H  | 2.416128  | 0.515445  | 0.928848  |

**TS2/3 (M=5)** $E = -97.517852$ 

|    |           |           |           |
|----|-----------|-----------|-----------|
| H  | 1.821212  | 0.825917  | 0.000210  |
| Ta | 0.244436  | -0.020248 | 0.000058  |
| C  | -2.129423 | 0.062028  | -0.000077 |
| H  | -2.115004 | 1.129601  | -0.231806 |
| H  | -2.414778 | -0.621764 | -0.796237 |
| H  | -2.358706 | -0.227805 | 1.024043  |

**TS3/4 (M=5)** $E = -97.458347$ 

|    |           |           |           |
|----|-----------|-----------|-----------|
| H  | -1.586067 | 0.634451  | 0.000000  |
| C  | 0.001081  | 1.787345  | -0.000000 |
| Ta | 0.001081  | -0.200142 | 0.000000  |
| H  | -0.082523 | 2.377036  | -0.914860 |
| H  | -0.082523 | 2.377036  | 0.914860  |
| H  | 1.665689  | -1.502263 | -0.000000 |

**TS4/5 (M=5)** $E = -97.469183$ 

|    |           |           |           |
|----|-----------|-----------|-----------|
| Ta | 0.201224  | 0.000001  | -0.000004 |
| C  | -1.837519 | -0.000012 | 0.000006  |
| H  | 0.601391  | 1.813101  | 0.186824  |
| H  | 0.601511  | -1.813082 | -0.186572 |
| H  | -2.433567 | -0.815277 | 0.415203  |
| H  | -2.433562 | 0.815254  | -0.415201 |

**TS5/6 (M=5)** $E = -97.462208$ 

|    |           |           |           |
|----|-----------|-----------|-----------|
| H  | 2.177864  | -0.767653 | -0.000022 |
| H  | 0.719078  | 1.644129  | 0.000015  |
| Ta | 0.183586  | -0.007794 | 0.000000  |
| C  | -1.893984 | -0.034306 | -0.000001 |
| H  | -2.492567 | 0.877105  | -0.000025 |
| H  | -2.442282 | -0.978771 | 0.000019  |

**TS2/6 (M=5)** $E = -97.491811$ 

|    |           |           |           |
|----|-----------|-----------|-----------|
| H  | -1.303087 | 1.041088  | -0.002093 |
| C  | -1.922081 | -0.098085 | 0.000132  |
| H  | -2.490242 | -0.249808 | -0.916692 |
| H  | -2.491391 | -0.243036 | 0.917339  |
| Ta | 0.248790  | -0.022819 | 0.000039  |
| H  | -0.344476 | 1.706045  | -0.002186 |

**TaCH<sub>2</sub><sup>+</sup> (M=5), iso1** $E = -96.341252$ 

|    |           |           |           |
|----|-----------|-----------|-----------|
| Ta | 0.216828  | 0.000000  | -0.000036 |
| C  | -1.829600 | 0.000003  | 0.001964  |
| H  | -2.425378 | -0.914302 | -0.004563 |
| H  | -2.425452 | 0.914260  | -0.004563 |

**TaCH<sub>2</sub><sup>+</sup> (M=5), iso2** $E = -96.296703$ 

|    |           |           |          |
|----|-----------|-----------|----------|
| Ta | 0.021384  | -0.181332 | 0.000000 |
| C  | 0.021384  | 1.827744  | 0.000000 |
| H  | -0.041085 | 2.912810  | 0.000000 |
| H  | -1.648268 | -0.642006 | 0.000000 |

## Structures used for benchmarking

### LM1

|    |          |              |             |
|----|----------|--------------|-------------|
| H  | -1.56002 | 0.864337     | -0.0613158  |
| C  | -2.27421 | -0.0126602   | 0.00863012  |
| Ta | 0.312789 | -0.000268004 | 5.00005e-05 |
| H  | -1.92463 | -0.985192    | -0.379087   |
| H  | -2.62292 | -0.104455    | 1.04243     |
| H  | -3.08077 | 0.320817     | -0.6574859  |

### LM2

|    |          |            |           |
|----|----------|------------|-----------|
| H  | 0.89004  | 1.57092    | 0         |
| C  | -1.80241 | 0.0608408  | 0         |
| Ta | 0.224819 | -0.0274854 | 0         |
| H  | -2.24966 | 1.06834    | 0         |
| H  | -2.11884 | -0.498922  | -0.908667 |
| H  | -2.11884 | -0.498922  | 0.908667  |

### LM3

|    |           |             |             |
|----|-----------|-------------|-------------|
| C  | 1.65081   | -0.0488887  | -0.00492407 |
| Ta | -0.182746 | -0.00837712 | -0.0303404  |
| H  | 1.50965   | 1.08037     | 0.188539    |
| H  | -0.445183 | 1.46383     | 0.856769    |
| H  | -0.320928 | -1.26331    | 1.15741     |
| H  | 2.69201   | -0.376022   | 0.0416986   |

### LM4

|    |            |           |           |
|----|------------|-----------|-----------|
| H  | 1.56071    | -1.52705  | 0.396415  |
| H  | 1.56071    | -1.52705  | -0.396415 |
| Ta | -0.0284284 | -0.156146 | 0         |
| C  | -0.0284284 | 1.69173   | 0         |
| H  | -1.17365   | 1.56908   | 0         |
| H  | 0.298058   | 2.73329   | 0         |

### LM5

|    |           |            |           |
|----|-----------|------------|-----------|
| H  | 0.621756  | 1.6516     | 0         |
| C  | 1.70318   | -0.073705  | 0         |
| H  | 2.29967   | -0.0977214 | 0.926277  |
| H  | 2.29967   | -0.0977214 | -0.926277 |
| Ta | -0.208393 | -0.0393405 | 0         |
| H  | -0.227478 | 1.85799    | 0         |

## Notes and references

- 1 R. Wester, *Phys. Chem. Chem. Phys.*, 2014, **16**, 396–405
- 2 B. Bastian, T. Michaelsen, J. Meyer and R. Wester, *Astrophys. J.*, 2019, **878**, 162
- 3 L. G. Parke, C. S. Hinton and P. B. Armentrout, *J. Phys. Chem. C*, 2007, **111**, 17773–17787
